# Supplementary material for: Serum microRNA as indicators of Wolfram syndrome’s progression in neuroimaging studies
Source: PubMed Central journal article supplement — BMJ Open Diabetes Res Care. 2020 Nov 1;8(2):e001379. doi: 10.1136/bmjdrc-2020-001379 (PMC7607591; doi:10.1136/bmjdrc-2020-001379), 2020-11-01
Supplement: bmjdrc-2020-001379supp001.pdf [file bmjdrc-2020-001379supp001.pdf]

Suppl. Table 1. Correlations between baseline miRNAs levels and age and markers of neurodegeneration in WFS patients.

WFS – Wolfram syndrome, MAT – macular average thickness.

|                 | Baseline miRNA correlations |              |                |              |                |              |                  |              |
|-----------------|-----------------------------|--------------|----------------|--------------|----------------|--------------|------------------|--------------|
|                 | Age                         |              | Baseline MAT   |              | Follow-up MAT  |              | Brainstem volume |              |
|                 | R                           | p level      | R              | p level      | R              | p level      | R                | p level      |
| hsa-miR-339-5p  | -0.382                      | 0.276        | 0.0742         | 0.85         | -0.2917        | 0.446        | 0.2435           | 0.498        |
| hsa-miR-30d-5p  | -0.0205                     | 0.952        | -0.3004        | 0.399        | -0.3945        | 0.259        | 0.2741           | 0.415        |
| hsa-miR-30c-5p  | -0.0002                     | 1,000        | 0.1367         | 0.707        | -0.0697        | 0.848        | 0.1236           | 0.717        |
| hsa-miR-139-5p  | 0.3607                      | 0.306        | -0.4809        | 0.19         | -0.6079        | 0.082        | -0.2278          | 0.527        |
| hsa-let-7g-5p   | -0.0173                     | 0.96         | -0.0139        | 0.97         | 0.6127         | 0.06         | 0.487            | 0.129        |
| hsa-miR-27b-3p  | 0.0098                      | 0.977        | 0.0827         | 0.82         | -0.305         | 0.392        | -0.383           | 0.245        |
| hsa-miR-106a-5p | 0.1112                      | 0.745        | -0.0049        | 0.989        | 0.4336         | 0.211        | 0.2749           | 0.413        |
| hsa-miR-574-3p  | -0.2155                     | 0.525        | -0.062         | 0.865        | -0.3966        | 0.257        | -0.1223          | 0.72         |
| hsa-miR-23b-3p  | -0.0423                     | 0.902        | -0.1628        | 0.653        | -0.4221        | 0.224        | -0.4171          | 0.202        |
| hsa-miR-126-3p  | 0.0215                      | 0.95         | -0.1986        | 0.582        | -0.3029        | 0.395        | -0.2225          | 0.511        |
| hsa-let-7d-3p   | 0.184                       | 0.588        | -0.3336        | 0.346        | -0.5661        | 0.088        | -0.1441          | 0.672        |
| hsa-miR-15a-5p  | -0.1103                     | 0.747        | 0.2919         | 0.413        | 0.5595         | 0.093        | 0.0526           | 0.878        |
| hsa-miR-29b-3p  | 0.2955                      | 0.378        | 0.09           | 0.805        | 0.1013         | 0.781        | 0.3565           | 0.282        |
| hsa-miR-652-3p  | -0.1768                     | 0.603        | -0.1089        | 0.765        | -0.284         | 0.426        | 0.1728           | 0.611        |
| hsa-miR-584-5p  | -0.3322                     | 0.318        | 0.2207         | 0.54         | -0.1183        | 0.745        | -0.1563          | 0.646        |
| hsa-miR-532-3p  | 0.3145                      | 0.376        | -0.0757        | 0.847        | -0.0991        | 0.8          | 0.4062           | 0.244        |
| hsa-miR-148b-3p | 0.278                       | 0.408        | -0.1148        | 0.752        | -0.1975        | 0.584        | -0.3821          | 0.246        |
| hsa-miR-421     | <b>-0.7543</b>              | <b>0.031</b> | 0.4196         | 0.349        | 0.3274         | 0.474        | -0.3021          | 0.467        |
| hsa-miR-144-3p  | 0.0868                      | 0.8          | 0.1655         | 0.648        | 0.5547         | 0.096        | 0.1338           | 0.695        |
| hsa-miR-382-5p  | -0.4622                     | 0.152        | 0.3304         | 0.351        | -0.2119        | 0.557        | -0.1253          | 0.713        |
| hsa-miR-375     | 0.3047                      | 0.425        | <b>-0.7194</b> | <b>0.044</b> | <b>-0.7311</b> | <b>0.039</b> | 0.0908           | 0.816        |
| hsa-miR-30e-3p  | -0.0624                     | 0.864        | 0.039          | 0.921        | 0.068          | 0.862        | 0.3206           | 0.366        |
| hsa-miR-193a-5p | -0.2492                     | 0.487        | -0.0159        | 0.968        | -0.4222        | 0.258        | 0.0209           | 0.954        |
| hsa-miR-145-5p  | 0.1683                      | 0.621        | -0.1108        | 0.76         | 0.1517         | 0.676        | <b>-0.6107</b>   | <b>0.046</b> |
| hsa-miR-374a-5p | 0.0443                      | 0.897        | 0.0658         | 0.857        | -0.0944        | 0.795        | -0.1164          | 0.733        |
| hsa-miR-22-3p   | -0.0336                     | 0.922        | 0.2261         | 0.53         | 0.2682         | 0.454        | 0.2078           | 0.54         |
