# Supplementary material for: Serum microRNA as indicators of Wolfram syndrome’s progression in neuroimaging studies
Source: PubMed Central journal article supplement — BMJ Open Diabetes Res Care. 2020 Nov 1;8(2):e001379. doi: 10.1136/bmjdrc-2020-001379 (PMC7607591; doi:10.1136/bmjdrc-2020-001379), 2020-11-01
Supplement: bmjdrc-2020-001379supp002.pdf [file bmjdrc-2020-001379supp002.pdf]

Suppl. Table 2. Correlations between follow-up miRNAs levels and age and markers of neurodegeneration in WFS patients.

WFS – Wolfram syndrome, MAT – macular average thickness.

|                 | Follow-up miRNA correlations |         |                |              |                |              |                  |              |
|-----------------|------------------------------|---------|----------------|--------------|----------------|--------------|------------------|--------------|
|                 | Age                          |         | Baseline MAT   |              | Follow-up MAT  |              | Brainstem volume |              |
|                 | R                            | p level | R              | p level      | R              | p level      | R                | p level      |
| hsa-miR-339-5p  | -0.1336                      | 0.695   | -0.4597        | 0.181        | -0.6033        | 0.065        | -0.2578          | 0.444        |
| hsa-miR-30d-5p  | 0.0899                       | 0.793   | -0.6234        | 0.054        | <b>-0.7786</b> | <b>0.008</b> | -0.3593          | 0.278        |
| hsa-miR-30c-5p  | -0.1428                      | 0.675   | 0.2982         | 0.403        | -0.167         | 0.645        | -0.1551          | 0.649        |
| hsa-miR-139-5p  | 0.0797                       | 0.827   | -0.2843        | 0.458        | -0.321         | 0.4          | 0.3478           | 0.325        |
| hsa-let-7g-5p   | 0.0517                       | 0.88    | 0.061          | 0.867        | 0.4815         | 0.159        | <b>0.612</b>     | <b>0.045</b> |
| hsa-miR-27b-3p  | -0.1977                      | 0.56    | 0.3902         | 0.265        | -0.1423        | 0.695        | 0.1419           | 0.677        |
| hsa-miR-106a-5p | 0.1469                       | 0.666   | 0.0515         | 0.888        | 0.503          | 0.138        | -0.0611          | 0.858        |
| hsa-miR-574-3p  | -0.3711                      | 0.291   | -0.2453        | 0.525        | -0.2392        | 0.535        | 0.4312           | 0.213        |
| hsa-miR-23b-3p  | -0.3578                      | 0.28    | 0.0953         | 0.793        | -0.332         | 0.349        | -0.1001          | 0.77         |
| hsa-miR-126-3p  | -0.1954                      | 0.565   | 0.2101         | 0.56         | -0.258         | 0.472        | 0.0504           | 0.883        |
| hsa-let-7d-3p   | 0.1746                       | 0.608   | -0.2985        | 0.402        | -0.4307        | 0.214        | -0.0727          | 0.832        |
| hsa-miR-15a-5p  | 0.1245                       | 0.715   | 0.2432         | 0.498        | 0.4605         | 0.18         | -0.0367          | 0.915        |
| hsa-miR-29b-3p  | 0.5812                       | 0.078   | -0.0021        | 0.996        | 0.1983         | 0.609        | 0.1382           | 0.703        |
| hsa-miR-652-3p  | -0.3532                      | 0.287   | 0.508          | 0.134        | 0.5878         | 0.074        | 0.4705           | 0.144        |
| hsa-miR-584-5p  | -0.3019                      | 0.43    | -0.0143        | 0.973        | -0.485         | 0.223        | -0.5596          | 0.117        |
| hsa-miR-532-3p  | -0.0367                      | 0.92    | -0.1243        | 0.75         | -0.1463        | 0.687        | 0.2733           | 0.445        |
| hsa-miR-148b-3p | 0.162                        | 0.634   | -0.1372        | 0.705        | 0.3871         | 0.269        | -0.0099          | 0.977        |
| hsa-miR-421     | 0.1426                       | 0.676   | 0.166          | 0.647        | -0.1635        | 0.652        | -0.2674          | 0.427        |
| hsa-miR-144-3p  | 0.2934                       | 0.381   | -0.0055        | 0.988        | 0.4149         | 0.233        | -0.238           | 0.481        |
| hsa-miR-382-5p  | -0.105                       | 0.788   | -0.2665        | 0.523        | -0.4643        | 0.246        | -0.6028          | 0.086        |
| hsa-miR-375     | 0.5284                       | 0.095   | -0.2474        | 0.491        | 0.0366         | 0.92         | 0.2784           | 0.407        |
| hsa-miR-30e-3p  | 0.1475                       | 0.684   | <b>-0.7866</b> | <b>0.012</b> | -0.6119        | 0.06         | -0.3752          | 0.285        |
| hsa-miR-193a-5p | 0.3627                       | 0.337   | -0.509         | 0.198        | <b>-0.7365</b> | <b>0.037</b> | 0.3271           | 0.39         |
| hsa-miR-145-5p  | -0.4238                      | 0.194   | 0.058          | 0.874        | -0.0423        | 0.908        | -0.2439          | 0.47         |
| hsa-miR-374a-5p | 0.0059                       | 0.989   | 0.4904         | 0.264        | 0.2371         | 0.572        | 0.2497           | 0.551        |
| hsa-miR-22-3p   | 0.2087                       | 0.538   | 0.2478         | 0.49         | <b>0.6507</b>  | <b>0.042</b> | 0.3183           | 0.34         |
